# Supplementary material for: Post-thaw ATP supplementation enhances cryoprotective effect of iodixanol in rat spermatozoa
Source: PubMed Central journal article supplement (PMC4731941; doi:10.1186/s12958-016-0141-5), 2016-01-29
Supplement: 12958_2016_141_MOESM1_ESM.pdf [file 12958_2016_141_MOESM1_ESM.pdf]

1 **Additional file 1**

2

3

Submitted to *Reproductive Biology and Endocrinology*

4

“Research Articles” category

5

6

**Full title: Post-thaw ATP supplementation enhances cryoprotective effect of iodixanol in rat**

7

**spermatozoa**

8

9

Suhee Kim<sup>1</sup>, Sarah Hooper<sup>1</sup>, Cansu Agca<sup>1</sup> and Yuksel Agca<sup>1,\*</sup>

10

11

<sup>1</sup>Department of Veterinary Pathobiology, College of Veterinary Medicine, University of Missouri-

12

Columbia, Columbia, Missouri 65211, USA

13

14

15

\*Corresponding author.

16

Yuksel Agca, DVM, MS, PhD

17

University of Missouri

18

College of Veterinary Medicine

19

1600 East Rollins Street, Room W191

20

Columbia, MO 65211

21

Phone: (573) 884-0311

22

E-mail: [agcay@missouri.edu](mailto:agcay@missouri.edu)

23

24

25

**Keywords:** ATP, Cryopreservation, rat spermatozoa, Iodixanol

26

1

27 **Additional Materials and Methods**

28

29 **Animals**

30 Twenty one sexually mature female rats (8-10 weeks old) were used for artificial insemination (AI).

31

32 **Surgical Artificial Insemination**

33 Intra uterine insemination (IUI) was performed with sperm that was frozen using extender contained  
34 2% OptiPrep<sup>TM</sup>, which improved sperm evaluation parameters. In order to prepare pseudo pregnant  
35 females for artificial insemination (AI), 8-10 week-old SD rats were synchronized by using  
36 intraperitoneal injections of 40 µg Des-Gly<sup>10</sup>, D-Ala<sup>6</sup> LHRH ethylamide acetate salt hydrate and  
37 subsequently mated with vasectomized males 4 day after LHRH injection. For AI, the pseudo  
38 pregnant females were anesthetized by injection of Ketamine (4.17 mg/100 g body weight) and  
39 Xylazine (0.83 mg/ 100g body weight) mixture. The fat pad surrounding the ovary were gently  
40 grasped with a tissue forceps and retracted/extracted until exposing the utero-tubal junction using  
41 standard surgical procedure. Both frozen–thawed and fresh sperm samples were diluted in HEPES-  
42 buffered mKRB containing 0.4% (w/v) BSA until insemination. About 50 µl sperm suspension  
43 (containing 3-4×10<sup>6</sup> spermatozoa) were loaded into a ~200 µm inner diameter glass transfer pipette,  
44 and the pipette was inserted into the uterine lumen and gently deposited. On the morning of day 21-  
45 22, the inseminated females were euthanized and were dissected to confirm pregnancy and counting  
46 numbers of live fetuses.

47

48 **Table S1** Developmental competence of frozen-thaw rat spermatozoa in the presence of 2%  
49 Optiprep™ after surgical intra uterine insemination

| Treatment     | No. Recipients | No. Pregnant (%)    | No. total live fetus | No. live fetus per recipient |
|---------------|----------------|---------------------|----------------------|------------------------------|
| Fresh         | 10             | 9 (90) <sup>a</sup> | 83                   | 9.2 <sup>a</sup>             |
| Frozen-thawed | 11             | 4 (36) <sup>b</sup> | 15                   | 3.75 <sup>b</sup>            |

50 Values within a column with different superscripts differ significantly ( $P < 0.05$ ).

51
